# Supplementary material
Source: Springer Nature journal article supplement (https://www.springermedizin.de/resource/supplementary/12913_2013_3743_MOESM2_ESM.pdf/9532298)
Supplement: MOESM2 [file 9532298]

| Questions                                                                                                                                                                                                                                                                                                                                                                                                                                                                                                 | Coding                |
|-----------------------------------------------------------------------------------------------------------------------------------------------------------------------------------------------------------------------------------------------------------------------------------------------------------------------------------------------------------------------------------------------------------------------------------------------------------------------------------------------------------|-----------------------|
| <b><i>Group membership</i></b>                                                                                                                                                                                                                                                                                                                                                                                                                                                                            |                       |
| 1. In the last 12 months, have you been an active member of any of the following type of groups in your village?<br><ul style="list-style-type: none"> <li>• Mass organization</li> <li>• Famer/Agriculture/Livestock association</li> <li>• Political group</li> <li>• Religious group</li> <li>• Credit/funeral group</li> <li>• Sports group</li> <li>• Other</li> </ul>                                                                                                                               | Score between 0 and 7 |
| <b><i>Support from groups</i></b>                                                                                                                                                                                                                                                                                                                                                                                                                                                                         |                       |
| 2. In the last 12 months, did you receive from the group any emotional help, economic help or assistance in helping you know or do things?<br><ul style="list-style-type: none"> <li>• Mass organization</li> <li>• Famer/Agriculture/Livestock association</li> <li>• Political group</li> <li>• Religious group</li> <li>• Credit/funeral group</li> <li>• Sports group</li> <li>• Other</li> </ul>                                                                                                     | Score between 0 and 7 |
| <b><i>Support from individual</i></b>                                                                                                                                                                                                                                                                                                                                                                                                                                                                     |                       |
| 3. In the last 12 months, did you receive any support or help from any one of the following, this can be emotional help, economic help or assistance in helping you know or do things?<br><ul style="list-style-type: none"> <li>• Family</li> <li>• Neighbors</li> <li>• Friends who are not neighbors</li> <li>• Village leaders</li> <li>• Religious leaders</li> <li>• Politicians</li> <li>• Government officials/civil service</li> <li>• Charitable organizations/NGOs</li> <li>• Other</li> </ul> | Score between 0 and 9 |
| <b><i>Citizenship activities</i></b>                                                                                                                                                                                                                                                                                                                                                                                                                                                                      |                       |
| 4. In the last 12 months, have you joined together with other village members to address a problem or common issues?                                                                                                                                                                                                                                                                                                                                                                                      | Yes=1,No=0            |
| 5. In the last 12 months, have you talked with local authority or Governmental organization about problems in this village?                                                                                                                                                                                                                                                                                                                                                                               | Yes=1,No=0            |
| <b><i>Cognitive Social Capital</i></b>                                                                                                                                                                                                                                                                                                                                                                                                                                                                    |                       |
| 6. In general, can the majority of people in this community be trusted?                                                                                                                                                                                                                                                                                                                                                                                                                                   | Yes=1,No=0            |
| 7. Do the majority of people in this village generally get along with each another?                                                                                                                                                                                                                                                                                                                                                                                                                       | Yes=1,No=0            |
| 8. Do you feel as though you are really a part of the village?                                                                                                                                                                                                                                                                                                                                                                                                                                            | Yes=1,No=0            |
| 9. Do you think that a majority of the people in the village would try to take advantage of you if they got the chance?                                                                                                                                                                                                                                                                                                                                                                                   | Yes=0,No=1            |
